# Supplementary material for: Wedelolactone Attenuates Pulmonary Fibrosis Partly Through Activating AMPK and Regulating Raf-MAPKs Signaling Pathway
Source: PubMed Central journal article supplement (PMC6411994; doi:10.3389/fphar.2019.00151), 2019-03-05
Supplement: Table_1.pdf [file Table_1.pdf]

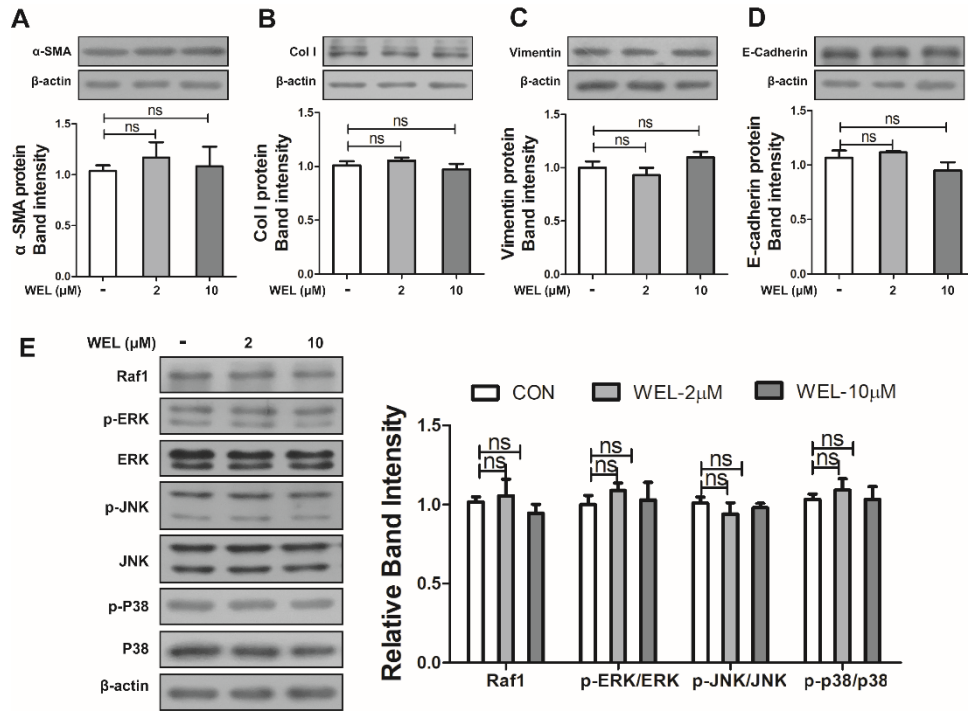

**Fig. S1** Influence of WEL on related protein levels of normal alveolar epithelial MLE-12 cells. The cells were incubated with WEL (2 or 10  $\mu$ M) or solvent for 48h. (A-D) Protein expressions of  $\alpha$ -SMA, Vimentin, Col I and E-cadherin in MLE-12 cells were detected by western blotting and PCR analysis. (E) Protein expressions of Raf1, JNK/p-JNK, p38/ p-p38, and ERK1/2 /p-ERK1/2 were detected by western blotting analysis. Data are presented as mean  $\pm$  SD (n = 5). NS, non-significant.

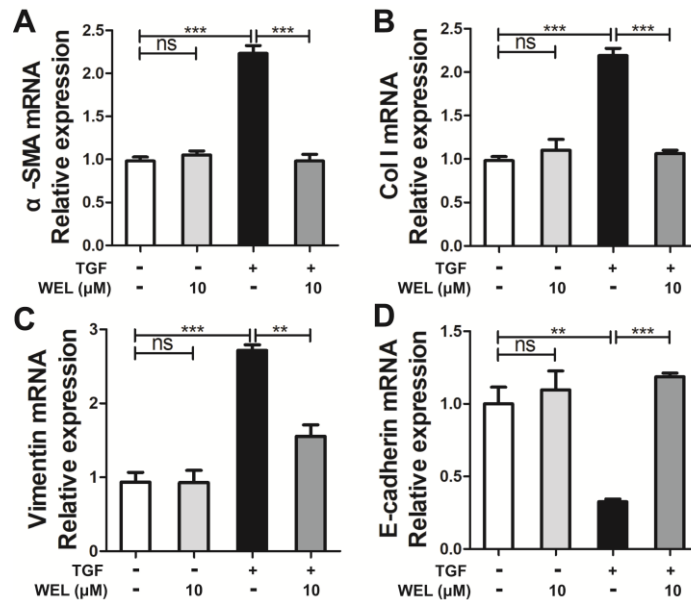

**Fig.S2** Regulation of WEL on the EMT of alveolar epithelial cells in TGF- $\beta$ 1 mediated MLE-12 cells. (A-D) mRNA levels of  $\alpha$ -SMA, Col I, Vimentin, and E-cadherin in MLE-12 cells treated with/without TGF- $\beta$ 1 were detected by PCR analysis. Data are presented as mean  $\pm$  SD (n = 5). NS, non-significant. \* $p$  < 0.05, \*\* $p$  < 0.01, \*\*\* $p$  < 0.001. NS, non-significant.
